# A stranger among us: the occurrence of *Cantellius* (Balnoidea: Pyrgomatidae) an epibiont of scleractinians in stylasterids (Hydrozoa)

ADI ZWEIFLER<sup>1</sup>, NOA SIMON-BLECHER<sup>1</sup>, DANIELA PICA<sup>2,\*</sup>, BENNY K. K. CHAN<sup>3</sup>, JONATHAN ROTH<sup>4</sup> and YAIR ACHITUV<sup>1,\*</sup>

<sup>1</sup>The Mina and Everard Goodman Faculty of Life Sciences, Bar Ilan University, Ramat Gan 529002, Israel

<sup>2</sup>Università Politecnica delle Marche-DiSVA, Laboratory of Zoology, Via Brecce Bianche, 60131 Ancona, Italy

<sup>3</sup>Biodiversity Research Center, Academia Sinica, Taipei 115, Taiwan

<sup>4</sup>DNA and Forensic Biology Laboratory, Division of Identification and Forensic Science, Israel Police National HQ, Jerusalem, Israel

Received 22 August 2019; revised 11 February 2020; accepted for publication 16 February 2020

Barnacles that fit morphologically into the description of the pyrgomatid genus *Cantellius* were retrieved from hydrozoan Stylasteridae. The use of molecular markers also confirmed the assignment of these barnacles to the genus *Cantellius*. Hitherto, stylasterids have not been recorded as hosts of pyrgomatids. This finding conflicts with and refutes the statement that scleractinians (Hexacorallia) are obligatory hosts of pyrgomatids. These are the first unequivocal records of living pyrgomatids in stylasterids, thus documenting a new type of habitat for this group of barnacles. Further inspections of stylasterids will probably reveal more new host records and, possibly, new pyrgomatids.

ADDITIONAL KEYWORDS: barnacles – coral reef – homoplasy – hydrozoan – lace coral – new species – phylogeny – Stylasteridae – symbiosis – taxonomy.

## INTRODUCTION

The family Pyrgomatidae includes highly modified epibiotic barnacles, traditionally considered to live in association with three host taxa, i.e. scleractinians, milleporids and sponges (Ross & Newman, 1973). Ross & Newman (2000) noted 24 genera of pyrgomatids that encompass 73 living species inhabiting 70 coral genera (Ogawa & Matsuzaki, 1992). Since then, more species of pyrgomatids have been described, and the number of the existing pyrgomatids is currently > 100. Some pyrgomatid genera are restricted to a single coral host genus or family, such as *Hoekia* Ross and Newman, 1973 found only on *Hydnophora* Fischer von Waldheim, 1807, whereas others are widely distributed, such as

species of *Trevathana* Anderson, 1992, *Galkinius* Perreault, 2014 and *Cantellius* Ross and Newman, 1973 found on a variety of hosts. However, among these genera, there are also species that are found on a single host genus. For example, *Cantellius septimus* (Hiro, 1938) is found only on *Montipora* Blainville, 1830.

Exploiting three concatenated molecular markers [12S ribosomal DNA (rDNA), 16S rDNA and 18S rDNA], Simon-Blecher *et al.* (2007) have narrowed down the pyrgomatid hosts to a sole subclass, Hexacorallia. They found that *Wanella milleporae* (Darwin, 1854), regarded as a pyrgomatid inhabiting the hydrozoan *Millepora* Linnaeus, 1758 (Darwin, 1854; Ross & Newman, 1973), did not cluster with the other pyrgomatids, but with free-living balanids. Their finding was supported by Malay & Michonneau (2014), who used two additional markers (*COI* and *H3*), by Perez-Losada *et al.* (2014) based on molecular analyses of five markers (18S rDNA, 28S rDNA, 12S rDNA, 16S rDNA and *COI*) from acorn barnacles, and

\*Corresponding author. E-mail: [achity@gmail.com](mailto:achity@gmail.com)

[Version of record, published online 9 April 2020; <http://zoobank.org/> urn:lsid:zoobank.org:pub:96954D17-136F-4D68-9D59-64C5EAFB6053]

the topology found by Tsang *et al.* (2014) using five other markers (12S rRNA, 16SrRNA, *EF1*, *H3* and *RP* gene sequences). In addition, in all four analyses, the archaeobalanid *Armatobalanus allium* (Darwin, 1854) is nested in Pyrgomatidae, suggesting that Pyrgomatidae is a paraphyletic taxon. Furthermore, Achituv & Simon-Blecher (2006, 2014) showed that *Pyrgopsella* Zullo, 1967 is associated with hexacorals and not with sponges as previously suggested by

Rosell (1975). They also pointed out that morphological traits, such as the fused shell plates and elongated scuta, found in the ‘*Savignium–Pyrgopsella*’ clade and in *Wanella*, are homoplasious traits, an adaptation to symbiotic life within the calcareous skeleton of scleractinians and hydrozoans. Taken together, these findings have led to the conclusion that pyrgomatids are restricted to Scleractinia and that the taxonomic position of *Wanella* should be re-evaluated.

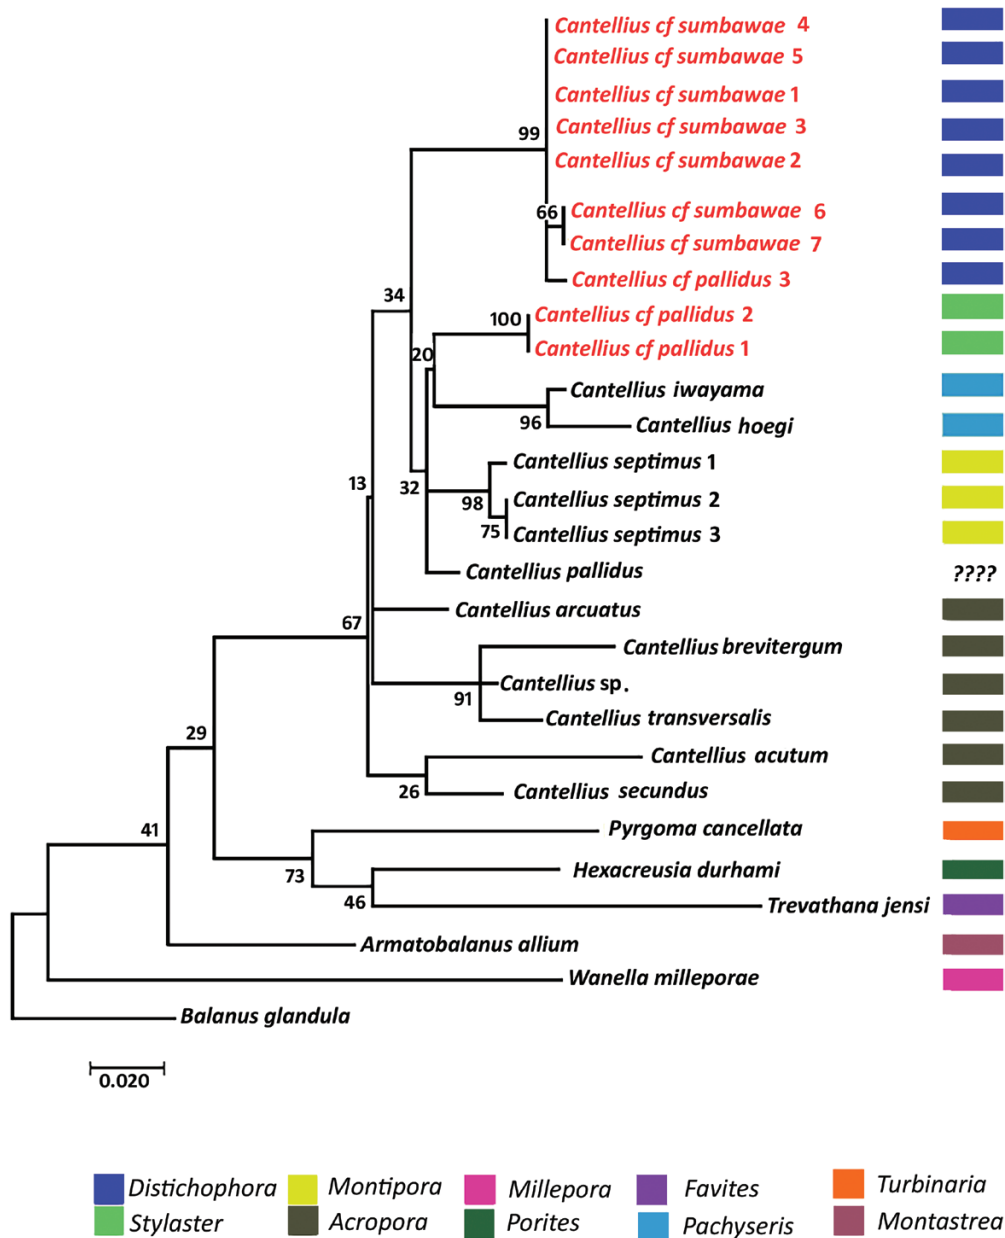

**Figure 1.** Maximum likelihood phylogenetic tree of *Cantellius* from stylasterids and scleractinians and representative pyrgomatids based on 12S rRNA. The outgroup was *Balanus glandula* Darwin, 185. The analysis involved 26 nucleotide sequences, of which 22 sequences were of *Cantellius* and ten were extracted from stylasterids (in red). Bootstrap support of nodes is shown next to the branches. The tree is drawn to scale, with branch lengths presenting the number of substitutions per site. Hosts are indicated by colour.

Stylasteridae, commonly known as ‘lace corals’, is a family of colonial cnidarians of the class Hydrozoa characterized by having a hard, calcareous skeleton. Owing to their three-dimensionally branching skeleton, they are considered habitat-forming species that are able to enhance the complexity of the habitat (Roberts *et al.*, 2006). Like many other sessile organisms, their skeleton serves as a substratum for other organisms establishing symbioses (Zibrowius, 1981; Pica *et al.*, 2012, 2015, 2016; Tribollet *et al.*, 2018). The epibiotic fauna of the stylasterids exhibits relatively poor documentation, probably owing to their cryptic nature or to the great depth at which most Stylasteridae occur. There is an equally poor understanding of barnacles as epibionts of stylasterids. Until recently, *Armatobalanus nefrens* (Zullo, 1963) was reported as an epibiont

of *Errinopora pourtalesi* (Dall, 1884) and *Stylaster californicus* (Verrill, 1866) in northern California (Newman, 2007). Pica *et al.* (2015) reported the presence of eight different symbiotic scalpellid species in five deep-water stylasterid corals. In the literature, the presence of pyrgomatids on Stylasteridae was recorded in two *Stylaster* species from the tropical shallow waters in the Indian Ocean (Broch, 1935, 1947). The specimens were identified as *Pyrgoma* sp., but this identification remains doubtful (Pica *et al.*, 2015). The comprehensive list of cnidarians hosting pyrgomatids compiled by Ogawa & Matsuzaki (1992) does not include stylasterids as hosts of pyrgomatids.

Preliminary examinations of barnacles found on several stylasterids revealed that they fit morphologically into the description of the pyrgomatid genus *Cantellius*. This result led us to hypothesize

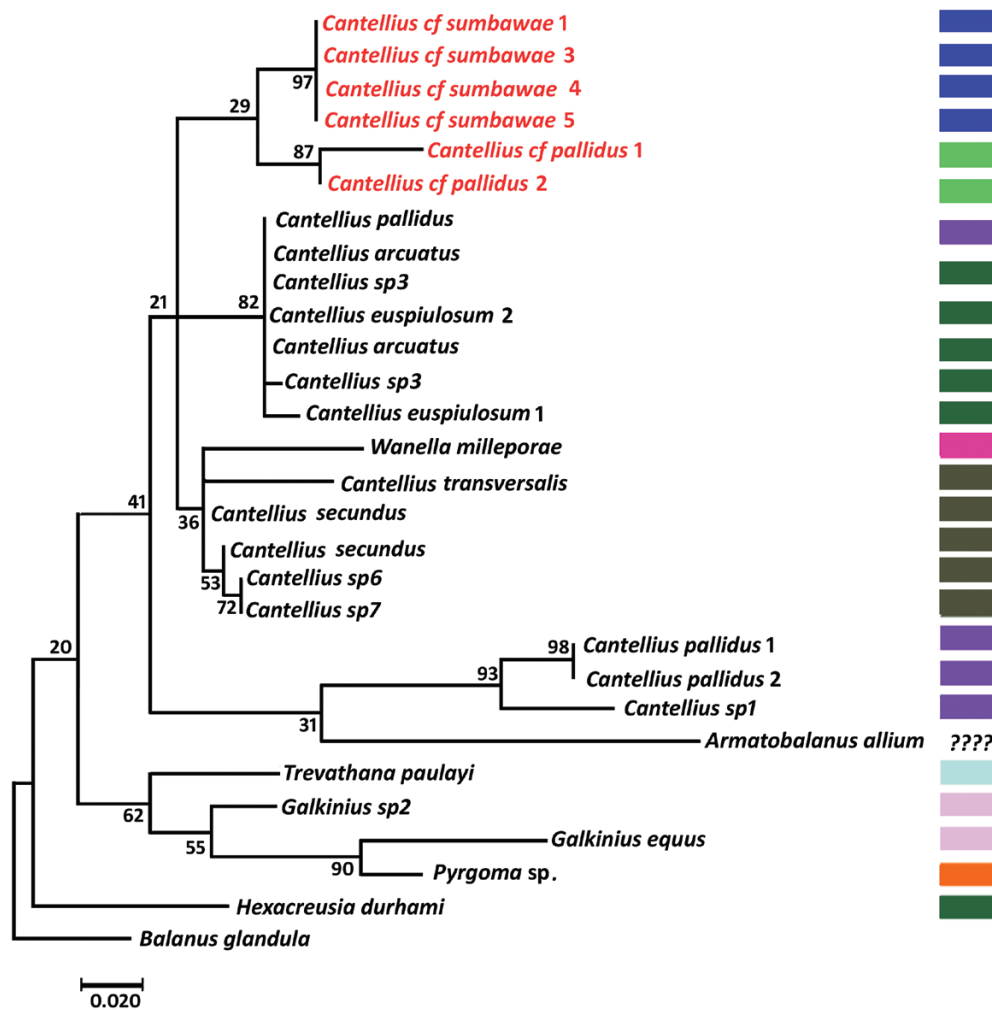

**Figure 2.** Maximum likelihood phylogenetic tree of *Cantellius* from stylasterids and scleractinians and representative pyrgomatids based on the nuclear marker histone 3 (*H3*). The outgroup is *Balanus glandula*. The analysis involved 25 nucleotide sequences, of which 19 sequences were of *Cantellius* and six were extracted from stylasterids. Bootstrap support of nodes is shown next to the branches. The tree is drawn to scale, with branch lengths presenting the number of substitutions per site. For key to host colour, see Figure 1.

that this association could be similar to the case of *Wanella* hosted by the hydrocoral *Millepora*, and therefore another case of convergent evolution, evolving independently in a similar habitat. However, the similarity of molecular markers indicates that in barnacles from stylasterids the morphological characters are homologous and casts doubt on our previous statement that pyrgomatids are obligatory epibionts of scleractinans (Hexacorallia) and on our previous concept of the taxonomy of the Pyrgomatidae.

The taxonomy of coral-inhabiting barnacles is based mainly on the morphology of hard parts, opercular valves and the shell. This is because, in many cases, the barnacles are retrieved from dried skeletons of corals, such as Darwin's (1854) eight varieties of *Creusia spinulosa* Leach, 1818 that are presently assigned to the genus *Cantellius*. The use of hard parts for description of species was followed by others (Borradaile, 1903; Hoek, 1913; Broch, 1931; Hiro, 1935,

1938; Kolosvary, 1947, 1948; Achituv, 2001) and also in the present study.

Based on the morphology of the shell and opercular valve, barnacles from stylasterids can be assigned to *Cantellius*, but owing to the small size and brittleness of the opercular valves, it is not always possible to assign all samples to known species of *Cantellius*. In addition, the absence of the type specimens of previously described species and the incomplete description of the type specimens do not enable the barnacles extracted from the stylasterids to be assigned with certainty to a known species of *Cantellius*. As a result of these uncertainties, we refer to these specimens as 'cf.'. We recognize three morphological forms, two of which, based on the number of shell plates and the morphology of scutum and tergum, are similar to known species of *Cantellius*, *Cantellius sumbawae* (Hoek, 1913) and *Cantellius pallidus* (Hiro, 1935), and a third one described below as a new species.

**Table 1.** Estimates of evolutionary distance between sequences (number of base substitutions per site) of 12S rRNA

|                                            | 1     | 2     | 3     | 4     | 5     | 6     | 7     | 8     | 9     |
|--------------------------------------------|-------|-------|-------|-------|-------|-------|-------|-------|-------|
| 1 <i>Cantellius</i> cf. <i>sumbawae</i> 3  |       |       |       |       |       |       |       |       |       |
| 2 <i>Cantellius</i> cf. <i>sumbawae</i> 2  | 0.000 |       |       |       |       |       |       |       |       |
| 3 <i>Cantellius</i> cf. <i>sumbawae</i> 4  | 0.000 | 0.000 |       |       |       |       |       |       |       |
| 4 <i>Cantellius</i> cf. <i>sumbawae</i> 7  | 0.004 | 0.004 | 0.004 |       |       |       |       |       |       |
| 5 <i>Cantellius</i> cf. <i>sumbawae</i> 6  | 0.004 | 0.004 | 0.004 | 0.000 |       |       |       |       |       |
| 6 <i>Cantellius</i> cf. <i>sumbawae</i> 1  | 0.000 | 0.000 | 0.000 | 0.004 | 0.004 |       |       |       |       |
| 7 <i>Cantellius</i> cf. <i>sumbawae</i> 5  | 0.000 | 0.000 | 0.000 | 0.004 | 0.004 | 0.000 |       |       |       |
| 8 <i>Cantellius</i> cf. <i>pallidus</i> 3  | 0.000 | 0.000 | 0.000 | 0.004 | 0.004 | 0.000 | 0.000 |       |       |
| 9 <i>Cantellius</i> cf. <i>pallidus</i> 4  | 0.048 | 0.048 | 0.048 | 0.052 | 0.052 | 0.048 | 0.048 | 0.048 |       |
| 10 <i>Cantellius</i> cf. <i>pallidus</i> 2 | 0.048 | 0.048 | 0.048 | 0.052 | 0.052 | 0.048 | 0.048 | 0.048 | 0.000 |
| 11 <i>Cantellius hoegi</i>                 | 0.056 | 0.056 | 0.056 | 0.059 | 0.059 | 0.056 | 0.056 | 0.056 | 0.056 |
| 12 <i>Cantellius iwayama</i>               | 0.056 | 0.056 | 0.056 | 0.059 | 0.059 | 0.056 | 0.056 | 0.056 | 0.044 |
| 13 <i>Cantellius pallidus</i>              | 0.052 | 0.052 | 0.052 | 0.056 | 0.056 | 0.052 | 0.052 | 0.052 | 0.048 |
| 14 <i>Cantellius septimus</i> 1            | 0.041 | 0.041 | 0.041 | 0.044 | 0.044 | 0.041 | 0.041 | 0.041 | 0.041 |
| 15 <i>Cantellius septimus</i> 2            | 0.041 | 0.041 | 0.041 | 0.044 | 0.044 | 0.041 | 0.041 | 0.041 | 0.041 |
| 16 <i>Cantellius septimus</i> 3            | 0.041 | 0.041 | 0.041 | 0.044 | 0.044 | 0.041 | 0.041 | 0.041 | 0.041 |
| 17 <i>Cantellius arcuatum</i>              | 0.037 | 0.037 | 0.037 | 0.041 | 0.041 | 0.037 | 0.037 | 0.037 | 0.044 |
| 18 <i>Cantellius brevitergum</i>           | 0.052 | 0.052 | 0.052 | 0.056 | 0.056 | 0.052 | 0.052 | 0.052 | 0.048 |
| 19 <i>Cantellius</i> sp.                   | 0.052 | 0.052 | 0.052 | 0.056 | 0.056 | 0.052 | 0.052 | 0.052 | 0.048 |
| 20 <i>Cantellius transversalis</i>         | 0.044 | 0.044 | 0.044 | 0.041 | 0.041 | 0.044 | 0.044 | 0.044 | 0.044 |
| 21 <i>Cantellius secundus</i>              | 0.056 | 0.056 | 0.056 | 0.059 | 0.059 | 0.056 | 0.056 | 0.056 | 0.063 |
| 22 <i>Cantellius acutum</i>                | 0.067 | 0.067 | 0.067 | 0.071 | 0.071 | 0.067 | 0.067 | 0.067 | 0.059 |
| 23 <i>Wanella milleporae</i>               | 0.127 | 0.127 | 0.127 | 0.131 | 0.131 | 0.127 | 0.127 | 0.127 | 0.111 |
| 24 <i>Pyrgoma cancellatum</i>              | 0.103 | 0.103 | 0.103 | 0.107 | 0.107 | 0.103 | 0.103 | 0.103 | 0.099 |
| 25 <i>Hexacreusia durhami</i>              | 0.103 | 0.103 | 0.103 | 0.107 | 0.107 | 0.103 | 0.103 | 0.103 | 0.091 |
| 26 <i>Armatobalanus allium</i>             | 0.079 | 0.079 | 0.079 | 0.083 | 0.083 | 0.079 | 0.079 | 0.079 | 0.063 |

The analysis involved 22 nucleotide sequences of *Cantellius* and three other pyrgomatids and the archobalanid *Armatobalanus allium*. Analyses were conducted using the maximum composite likelihood model.

MATERIAL AND METHODS

Material from three scientific collections is studied: The Steinhardt Museum of Natural History, Tel Aviv University, Tel Aviv, Isreal (TAU); the Università Politecnica delle Marche-DiSVA (UNIVPM DiSVA), Ancona, Italy; and the Museum National d’Histoire Naturelle, Paris, France (MNHN). Details on the samples used are presented in the [Supporting Information \(Appendix S1\)](#).

For the morphological study, the wall plates and opercular valves were removed from the hydroid, immersed for ~2 h in household bleach, rinsed in tap water followed by distilled water and then dried on a hotplate at 80 °C. The specimens were examined under a dissecting microscope, and the adherent chitin was removed using needles and a fine paintbrush. The dried parts were mounted on brass stubs, coated with gold and examined with a JEOL scanning electron microscope at 25 kV. Images were stored using the Autobeam software.

Only the material attached to the colony of *Distichopora* sp. from The Steinhardt Museum of

Natural History stored in ethanol was suitable for studying the soft parts, the trophi and cirri, and could be used for molecular analysis. Material from other hosts was either dried or too small to use for the morphological study of soft parts or molecular work.

For DNA extraction, barnacles were dissected, and muscles and cirri fixed in ethanol were used. DNA was extracted using a genomic DNA isolation kit (Macherey-Nagel GmbH & Co. KG, Düren, Germany), according to the manufacturer’s protocol. The DNA concentration was determined by NanoDrop ND1000 (Thermo Fisher Scientific Inc., Waltham, MA, USA) at 260 nm.

The DNA from small specimens was extracted at the forensic biology laboratory of Israel Police HQ, Jerusalem and transferred into clean tubes containing ethanol. Each sample was dried on filter paper and moved to a new clean tube. Two-step DNA extraction was performed. Samples were first extracted at 56 °C for 2 h using a Chelex extraction (Walsh *et al.*, 1991) and then by using the AutoMate

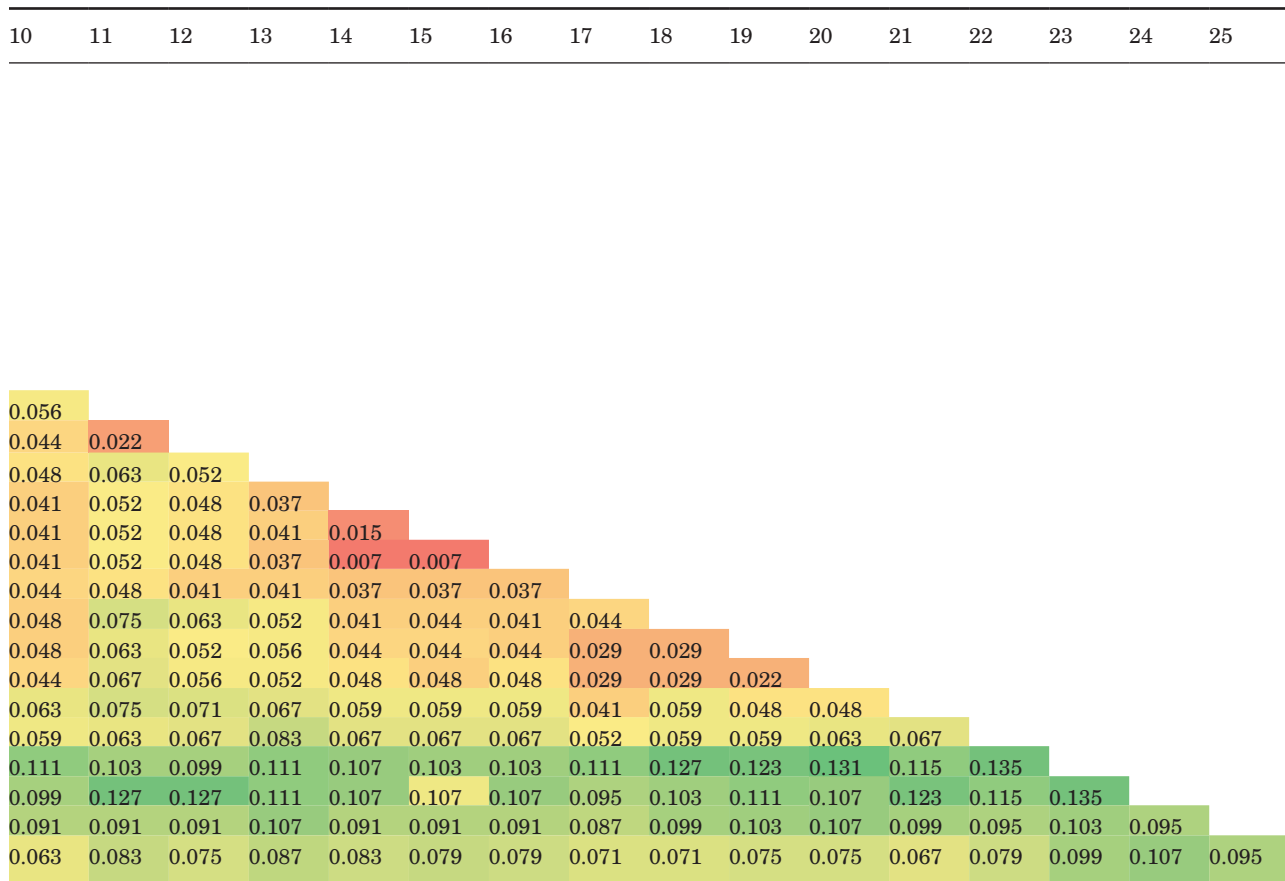

Express DNA Extraction System in conjugation with the PrepFiler Express Forensic DNA Forensic Kit (Applied Biosystems, Foster City, CA, USA) according to the manufacturer's protocol (Feine *et al.*, 2016).

For amplification and sequencing of the 12S subunit of mitochondrial rRNA, we used the primer set of Kocher *et al.* (1989) as modified by Mokady *et al.* (1999). For histone 3 (*H3*), we used the primers of Colgan *et al.* (1998). Amplification was carried out in a personal combi-thermocycler (Biometra, Göttingen, Germany), following the protocols of Tsang *et al.* (2012). The PCR products were purified and sequenced by MCLAB (San Francisco, CA, USA). Both strands were sequenced using an ABI PRISM 3100 Genetic Analyzer (Applied Biosystems).

Additional DNA sequences were retrieved from GenBank. Details about hosts, when available, and accession numbers are provided in the Supporting

Information (Table S1), which contains sequences from *Cantellius* marked by numbers, i.e. sp. 1, etc., by their submitter rather than being identified to the species level. We adhered to the naming and numbering of each sample as originally submitted to GenBank.

Sequences were aligned using CLUSTAL W (Thompson *et al.*, 1994). The length of the aligned sequences of 12S is 297 bp with 87 variable sites, of which 60 are parsimony informative. The aligned *H3* contigs are shorter, i.e. 197 bp with 56 variable sites, of which 46 are parsimony informative. Phylogenetic analyses were performed based on maximum likelihood (ML) analysis, and 1000 bootstrap replicates were conducted using MEGA7 (Kumar *et al.*, 2016). A matrix of pairwise distances within and among the species was calculated in MEGA7 using Kimura's 2-parameter (K2P; Kumar *et al.*, 2016).

**Table 2.** Estimates of evolutionary distance between sequences (number of base substitutions per site) of histone 3 (*H3*)

|    |                                   | 1     | 2     | 3     | 4     | 5     | 6     | 7     | 8     | 9     | 10    | 11    |
|----|-----------------------------------|-------|-------|-------|-------|-------|-------|-------|-------|-------|-------|-------|
|    | Host                              |       |       |       |       |       |       |       |       |       |       |       |
| 1  | <i>Cantellius cf. sambawae</i> 1  |       |       |       |       |       |       |       |       |       |       |       |
| 2  | <i>Cantellius cf. sambawae</i> 2  | 0.000 |       |       |       |       |       |       |       |       |       |       |
| 3  | <i>Cantellius cf. sambawae</i> 3  | 0.000 | 0.000 |       |       |       |       |       |       |       |       |       |
| 4  | <i>Cantellius cf. sambawae</i> 4  | 0.000 | 0.000 | 0.000 |       |       |       |       |       |       |       |       |
| 5  | <i>Cantellius cf. pallidus</i>    | 0.029 | 0.029 | 0.029 | 0.029 |       |       |       |       |       |       |       |
|    | <i>vervoorti</i>                  |       |       |       |       |       |       |       |       |       |       |       |
| 6  | <i>Cantellius arcuatum</i>        | 0.042 | 0.042 | 0.042 | 0.042 | 0.036 |       |       |       |       |       |       |
| 7  | <i>Cantellius euspinulosum</i>    | 0.042 | 0.042 | 0.042 | 0.042 | 0.036 | 0.012 |       |       |       |       |       |
| 8  | <i>Cantellius transversalis</i> 1 | 0.055 | 0.055 | 0.055 | 0.055 | 0.054 | 0.048 | 0.061 |       |       |       |       |
| 9  | <i>Cantellius sp. 7</i>           | 0.042 | 0.042 | 0.042 | 0.042 | 0.041 | 0.041 | 0.054 | 0.036 |       |       |       |
| 10 | <i>Cantellius sp. 6</i>           | 0.042 | 0.042 | 0.042 | 0.042 | 0.041 | 0.041 | 0.054 | 0.036 | 0.000 |       |       |
| 11 | <i>Cantellius euspinulosum</i>    | 0.017 | 0.017 | 0.017 | 0.017 | 0.023 | 0.041 | 0.042 | 0.061 | 0.048 | 0.048 |       |
| 12 | <i>Cantellius secundus</i> 2      | 0.036 | 0.036 | 0.036 | 0.036 | 0.035 | 0.035 | 0.048 | 0.042 | 0.006 | 0.006 | 0.042 |
| 13 | <i>Cantellius secundus</i> 1      | 0.030 | 0.030 | 0.030 | 0.030 | 0.029 | 0.029 | 0.042 | 0.036 | 0.011 | 0.011 | 0.036 |
| 14 | <i>Cantellius pallidus</i>        | 0.042 | 0.042 | 0.042 | 0.042 | 0.036 | 0.000 | 0.012 | 0.048 | 0.041 | 0.041 | 0.041 |
| 15 | <i>Cantellius sp. 3</i>           | 0.042 | 0.042 | 0.042 | 0.042 | 0.036 | 0.000 | 0.012 | 0.048 | 0.041 | 0.041 | 0.041 |
| 17 | <i>Cantellius euspinulosum</i>    | 0.042 | 0.042 | 0.042 | 0.042 | 0.036 | 0.000 | 0.012 | 0.048 | 0.041 | 0.041 | 0.041 |
| 18 | <i>Cantellius sp. 3</i>           | 0.036 | 0.036 | 0.036 | 0.036 | 0.042 | 0.006 | 0.017 | 0.055 | 0.048 | 0.048 | 0.048 |
| 19 | <i>Cantellius euspinulosum</i>    | 0.048 | 0.048 | 0.048 | 0.048 | 0.042 | 0.006 | 0.006 | 0.055 | 0.048 | 0.048 | 0.048 |
| 20 | <i>Cantellius pallidus</i>        | 0.066 | 0.066 | 0.066 | 0.066 | 0.066 | 0.093 | 0.093 | 0.121 | 0.106 | 0.106 | 0.060 |
| 21 | <i>Cantellius iwayama</i> 1       | 0.073 | 0.073 | 0.073 | 0.073 | 0.087 | 0.109 | 0.110 | 0.101 | 0.101 | 0.101 | 0.081 |
| 22 | <i>Cantellius pallidus</i> 1      | 0.066 | 0.066 | 0.066 | 0.066 | 0.066 | 0.093 | 0.093 | 0.121 | 0.106 | 0.106 | 0.060 |
| 23 | <i>Cantellius sp. 1</i>           | 0.073 | 0.073 | 0.073 | 0.073 | 0.087 | 0.109 | 0.110 | 0.101 | 0.101 | 0.101 | 0.081 |
| 24 | <i>Trevathana paulayi</i>         | 0.068 | 0.068 | 0.068 | 0.068 | 0.074 | 0.079 | 0.080 | 0.086 | 0.066 | 0.066 | 0.081 |
| 25 | <i>Pyrgoma cancellata</i>         | 0.113 | 0.113 | 0.113 | 0.113 | 0.112 | 0.127 | 0.142 | 0.108 | 0.092 | 0.092 | 0.113 |
| 26 | <i>Galkinia sp. 2</i>             | 0.081 | 0.081 | 0.081 | 0.081 | 0.074 | 0.086 | 0.087 | 0.107 | 0.066 | 0.066 | 0.093 |
| 27 | <i>Galkinia sp. 1</i>             | 0.092 | 0.092 | 0.092 | 0.092 | 0.079 | 0.093 | 0.106 | 0.100 | 0.084 | 0.084 | 0.105 |
| 28 | <i>Galkinia equus</i>             | 0.126 | 0.126 | 0.126 | 0.126 | 0.132 | 0.132 | 0.146 | 0.120 | 0.097 | 0.097 | 0.126 |
| 29 | <i>Hexacreusia durhami</i>        | 0.109 | 0.109 | 0.109 | 0.109 | 0.102 | 0.102 | 0.108 | 0.088 | 0.067 | 0.067 | 0.123 |
| 30 | <i>Armatobalanus allium</i>       | 0.121 | 0.121 | 0.121 | 0.121 | 0.118 | 0.107 | 0.113 | 0.123 | 0.093 | 0.093 | 0.106 |

The analysis involved 22 nucleotide sequences of *Cantellius* and six other pyrgomatids and *Armatobalanus allium*. Analyses were conducted using the maximum composite likelihood model.

RESULTS

PHYLOGENY

Figures 1 and 2 present ML trees based on the mitochondrial marker 12S rRNA and the nuclear marker *H3*, respectively. Both markers show that the specimens extracted from stylasterids cluster with *Cantellius*.

In the ML trees based on 12S rRNA, all sequences of barnacles extracted from *Distichopora* are grouped. The sequences that we obtained from *Distichopora violacea* (Pallas, 1766) and identified morphologically as *Cantellius* cf. *pallidus* (Broch, 1931) cluster with those from the unidentified colony of *Distichopora*. The two sequences extracted from *Stylaster* cf. *eximius* (Hickson & England, 1905) and *Stylaster tenisonwoodsii* Cairns, 1988 form a separate clade within the *Cantellius* clade, but the bootstrap support values of the nodes within this clade are low. The

phylogenetic pattern based on *H3* agrees with the 12S analyses with regard to the grouping of the barnacles from *Distichopora*. In the *H3* tree, the two sequences of *Cantellius* cf. *pallidus* extracted from *Stylaster* form a sister group to the sequences of *Cantellius* cf. *sumbawae* extracted from *Distichopora*. However, the bootstrap support of the node that separates this clade from the other taxa of *Cantellius* is low.

Of interest is the position of *Wanella* in the two phylogenetic trees. The position of *Wanella* on the tree based on 12S rDNA sequences is similar to what was found previously, i.e. as a monogeneric clade sister to the pyrgomatids (Tsang *et al.*, 2012; Simon-Blecher *et al.*, 2007), or it clustered with other balanids (Malay & Michonneau, 2014; Pérez-Losada *et al.*, 2014). The position of *Wanella* in the tree based on *H3* is different. In this analysis, *Wanella* clusters with the pyrgomatids. This does not agree with the analyses of Malay & Michonneau (2014) and Tsang *et al.* (2012),

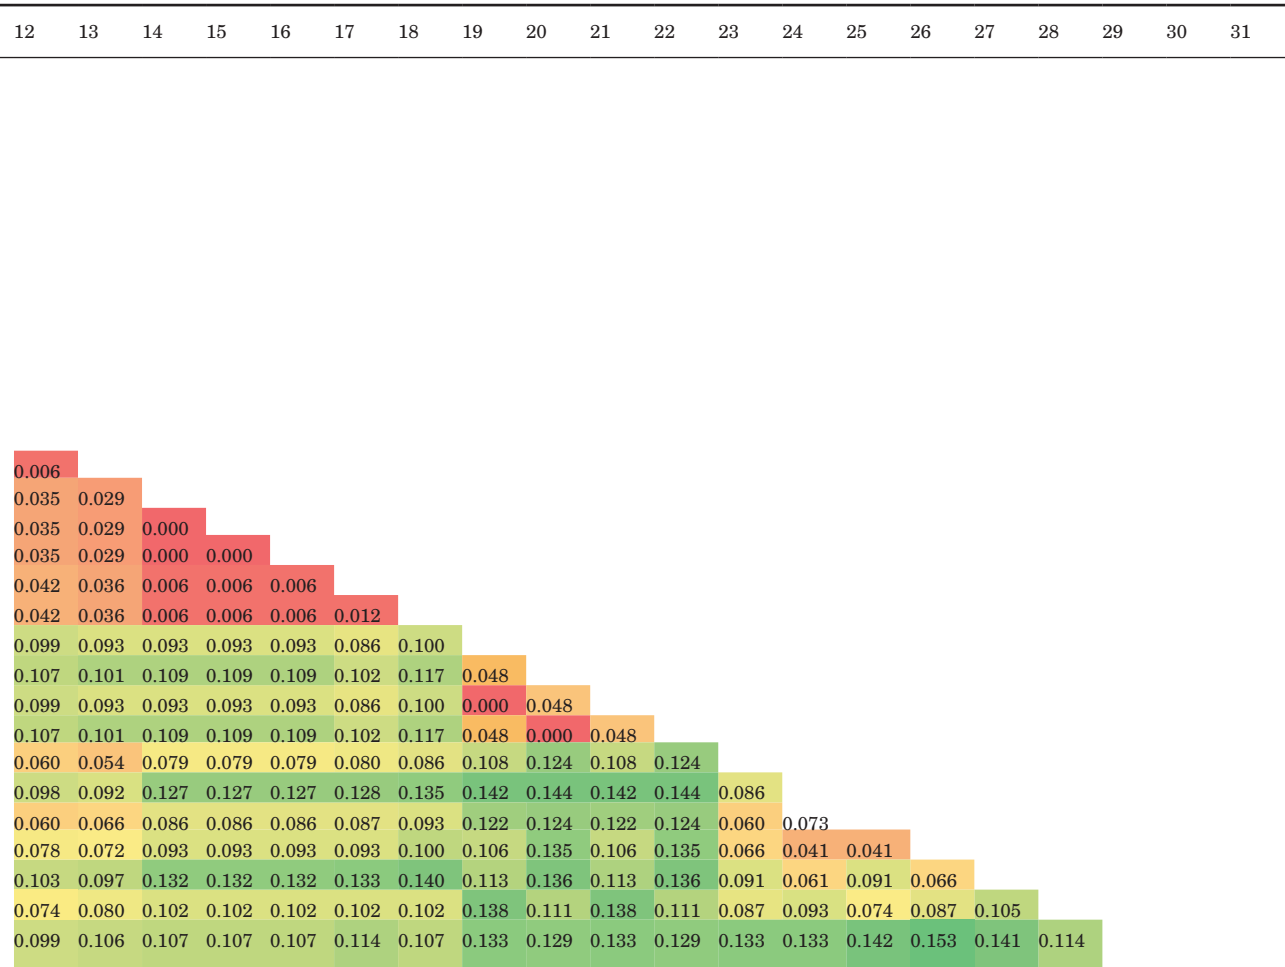

in which one of their markers was *H3*. The inclusion of *Wanella* in the *Cantellius* clade supports the hypothesis that they share a common ancestor. The *H3* gene is more conserved, and its evolution is slower than that of the rDNAs and mitochondrial genes used in the concatenated markers. Hence, its weight in the phylogeny is 'diluted' by the other genes.

The pairwise divergence values of 12S rRNA and *H3* between specimens of our material and those of other species of *Cantellius* and representative pyrgomatids enable us to set boundaries between evolutionary significant units (ESUs). These values are presented in Tables 1 and 2, respectively. The within-group pairwise distances of 12S rRNA of the seven specimens extracted from the single colony of *Distichopora* collected in Bali, Indonesia do not exceed 0.004. The distance between the 12S sequence of the barnacles extracted from *Distichopora violacea* from the Siladen Islands and those from Bali are in the same range. The pairwise 12S rRNA of two specimens, one extracted from *Stylaster tenisonwoodsii* and the other

from *S. cf. eximius*, is 0.000. The distance between these and those from *Distichopora* is 0.048 and 0.052, respectively. In 12S rRNA sequences, the range of pairwise distances between these specimens and other species of *Cantellius* lies between 0.041 in *C. septimus* and 0.071 in *Cantellius acutum* (Hiro, 1938) (Table 1). These values are within the range found among other species of *Cantellius*, with the highest being 0.083 between *C. acutum* and *C. pallidus* and the lowest being 0.022 between *Cantellius brevitergum* (Hiro, 1938) and an unidentified *Cantellius*.

In the *H3* sequences, the within-group pairwise distances of the four specimens extracted from *Distichopora* is 0.000, and the one between those and the specimen from *Stylaster* is 0.048. The maximal divergence between the specimens from stylasterids and the two unidentified species *Cantellius* sp. 1 and *Cantellius* sp. 6 extracted from the scleractinians is 0.086. These values are within the range found among different morphologically identified species of *Cantellius*; the highest 0.120 between *Cantellius*

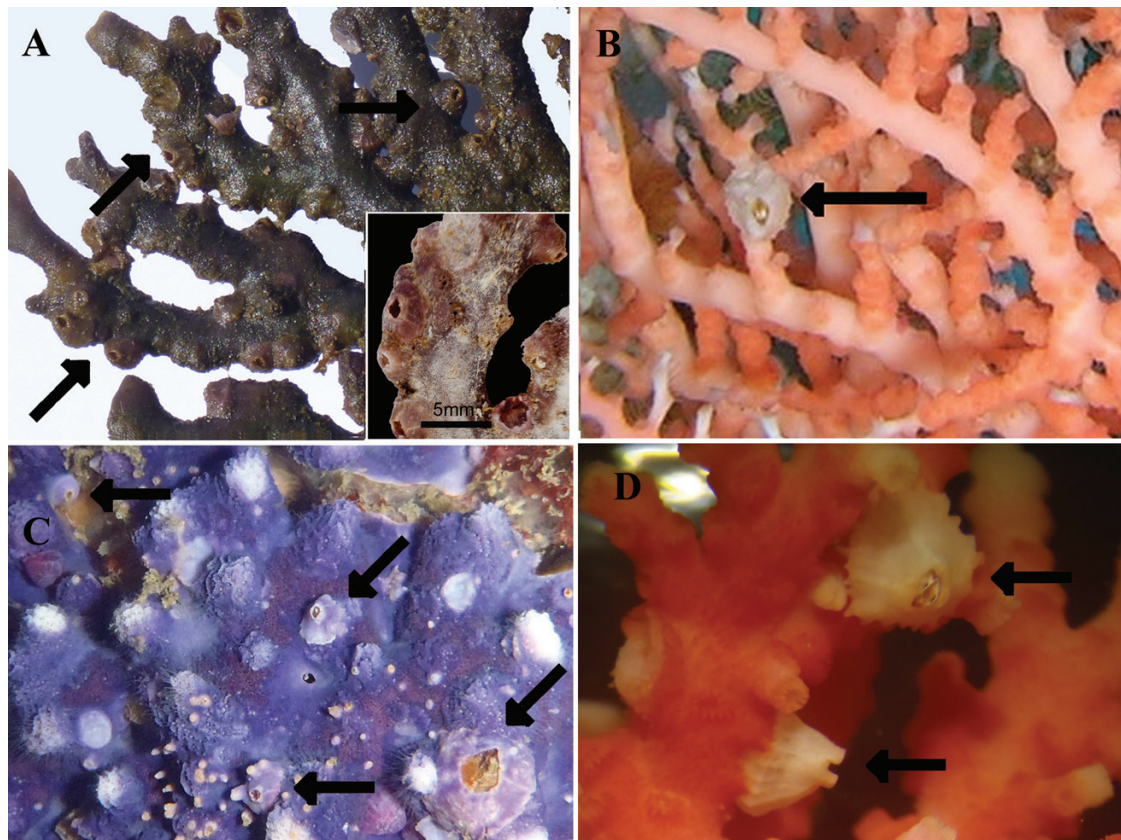

**Figure 3.** *In situ* pictures of colonies of Stylasteridae with barnacles. A, colony of *Distichopora* sp. from Bali, Indonesia, with *Cantellius cf. sumbawae*; inset, enlargement of a branch. B, *Stylaster cf. eximius* from Siladen Island, Indonesia, colony carrying barnacles. C, *Distichopora cf. vervoorti* colony carrying barnacles. D, colony of *Stylaster tenisonwoodsii* from Bangka Island, Indonesia, carrying barnacles. Barnacles are indicated by arrows.



*transversalis* (Nilsson-Cantell, 1938) and *C. pallidus*. Therefore, we propose that taxa with pairwise distances of sequences that are within the range of these divergence levels should be assigned to the same clade as *Cantellius*.

## TAXONOMY

### *CANTELLIUS* CF. *SUMBAWAE* (HOEK, 1913)

*Examined material*: Host *Distichopora* sp., TAU AR29843, Bali, Indonesia (Figs 3A, 4–7), 5 November 2017.

*Description*: Barnacles are scattered along the branches of the hydrozoan colony (Fig. 3A), mostly on the lateral side of the branches (Fig. 3A, inset). Shell conical, four plated (rostrum, carina and paired latera; Fig. 4A, C), externally covered by the hydroid skeleton and tissue (Fig. 4A, B). Carinorostral diameter,  $4.35 \pm 1.36$  mm ( $N = 11$ ), sheath forming inner lamina. Basis, shallow cup shape with radiating ridges and furrows (Fig. 4D, E) reaching the centre of the basis. Orifice central, small. Scutum and tergum (Fig. 5A) separated, white. Scutum triangular; basal margin sinusoidal; length approximately equal to

tergal margin. Both the occludent margin and the tergal margin straight. Externally, growth ridges parallel to basal margin outline, forming teeth on occludent margin. Shallow cavity for lateral depressor. Inner side with prominent adductor ridge; articular ridge on tergal margin occupying nearly the entire length of the margin. Tergum elongated; carinal margin about two-thirds of scutal margin, with blunt rounded spur; scutal margins slightly curved, apical angle  $\sim 60^\circ$ ; small beak at the apex; basal margins sinusoidal; external surface with growth ridges parallel to basal margins; shallow median furrow from apex to spur base. Inner side with articular ridge along the scutal margin. Small pits scattered on the inner side. Maxilla rounded (Fig. 6A), with simple setae along interior margin and distal part. Maxillule (Fig. 6C) cutting edge straight, without notch, with row of seven large setae. Surface of maxillule close to cutting edge, with short, simple type of setae. Simple setae on upper and lower margins. Mandibule (Fig. 6E) with five teeth; gap between first tooth and second tooth; second tooth located in middle of cutting edge; gap between second and third tooth. Second to fourth teeth bidentate. Surface of mandible close to cutting edge from upper to third tooth, with short simple setae. Mandibular palp elongated (Fig. 6D); setae on inferior margin; lower

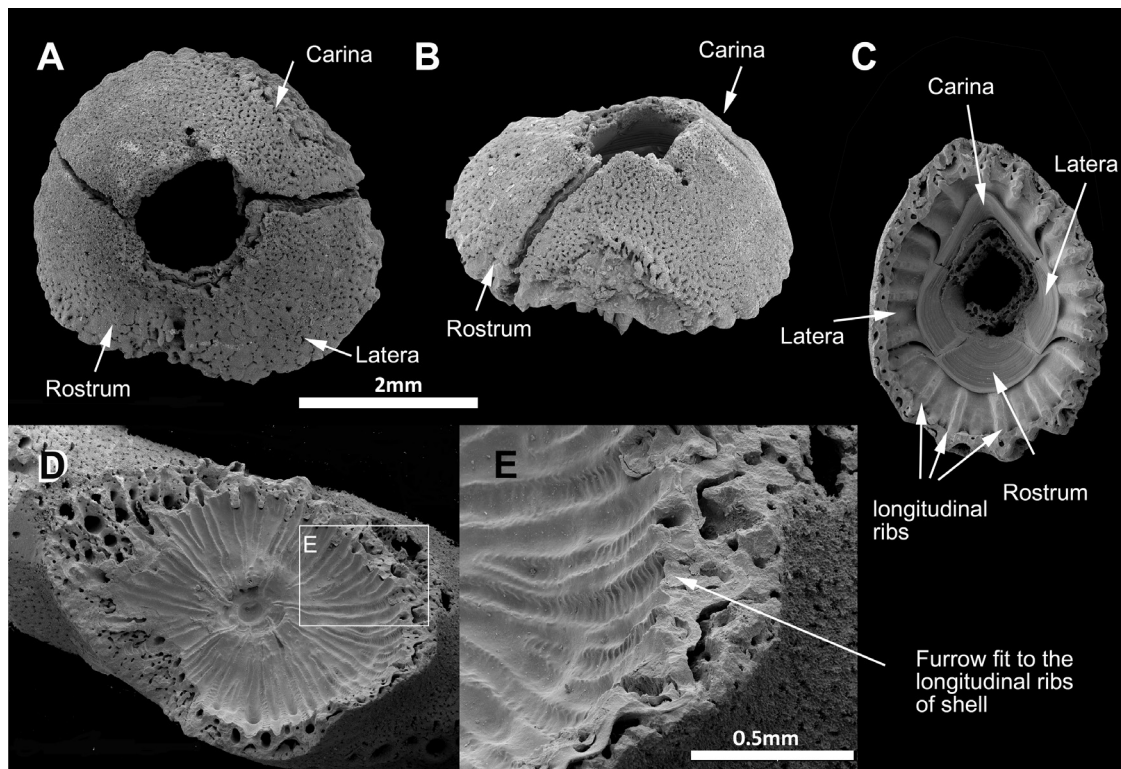

**Figure 4.** *Cantellius* cf. *sumbawae*. A, external view of shell, upper view. B, external view of shell, side view. C, inner view of shell. D, basis. E, enlargement of basis.

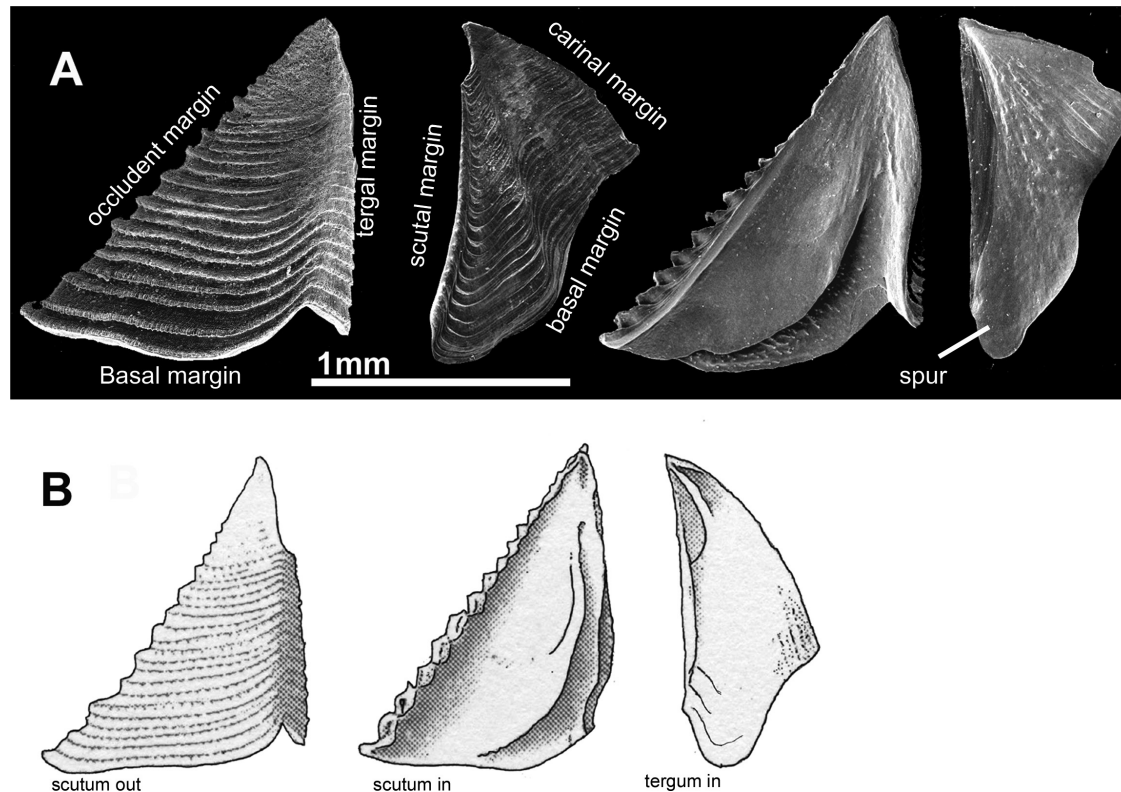

**Figure 5.** A, opercular valves of *Cantellius* cf. *sumbawae* from *Distichopora* sp. Outer and inner sides are shown. B, *Cantellius sumbawae* opercular valves from the small, solitary, free-living coral *Heteropsammia*, redrawn from plate XXVII, Hoek (1913).

and upper margins with simple setae. Labrum bilobed (Fig. 4B) with V-shaped notch between lobes; two or three sharp teeth on each lobe (Fig. 6B). Cirrus I (Fig. 7A) rami unequal; anterior ramus ten articles longer; posterior ramus five articles; distal article with mixed setae. Cirrus II with equal rami; anterior with seven articles and posterior with five articles. Terminal setae (Fig. 7G) simple. Cirrus III (Fig. 7C) anterior ramus with eight to nine articles, with short sharp teeth on front of articles (Fig. 7F); posterior ramus with six to seven articles. Cirri IV–VI long (Fig. 7D, E), slender, with both rami of similar length. Penis long, annulated with scattered short simple setae; pedicel (Fig. 7E) with short basidorsal point.

*Remarks:* Based on the morphology of the opercular valves, the barnacles found on *Distichopora* fit into the description of *C. sumbawae* (Fig. 5B). *Cantellius sumbawae* was based on a single specimen attached to the small, solitary, free-living coral, *Heteropsammia*. The coral and its barnacle were dredged during the Siboga expedition in February 1900 at ~36 m depth on a sandy or muddy bottom in Saleh Bay anchorage, east of Dangar Besar on the Indonesian island of Sumbawa. The comprehensive list of barnacles and their host corals (Ogawa & Matsuzaki, 1992) indicates

that since *C. sumbawae* was described, it has not been recorded from any other coral. The Hoek specimen could not be traced in the collection of the Naturalis Biodiversity Centre, Leiden, The Netherlands, where the Siboga expedition material is stored. There are differences between Hoek's specimen and those found on *Distichopora*. The stylasterid skeleton completely encrusts the barnacle shell, whereas this was not reported by Hoek (1913). Brickner *et al.* (2010) suggested that the overgrowth of the coral skeleton and coverage of the barnacle shell is a result of the coral growth and should be regarded as a coral character rather than a barnacle character. However, without examination and comparison of barnacles on *Heteropsammia*, it is uncertain whether the barnacles from both hosts belong to the same species. Owing to this uncertainty, we prefer to identify our specimens as *Cantellius* cf. *sumbawae*.

*CANTELLIUS* CF. *PALLIDUS* (BROCH, 1931) (FIGS 8, 9)

*Examined material:* MNHN-IU-5863, host *Stylaster flabelliformis* (Lamarck, 1816). MNHN-IK-2015-658, 12°34.6'S, 45°05.2'E, 21 March 1977. MNHN-IU-2014-5873, host *Distichopora violacea*

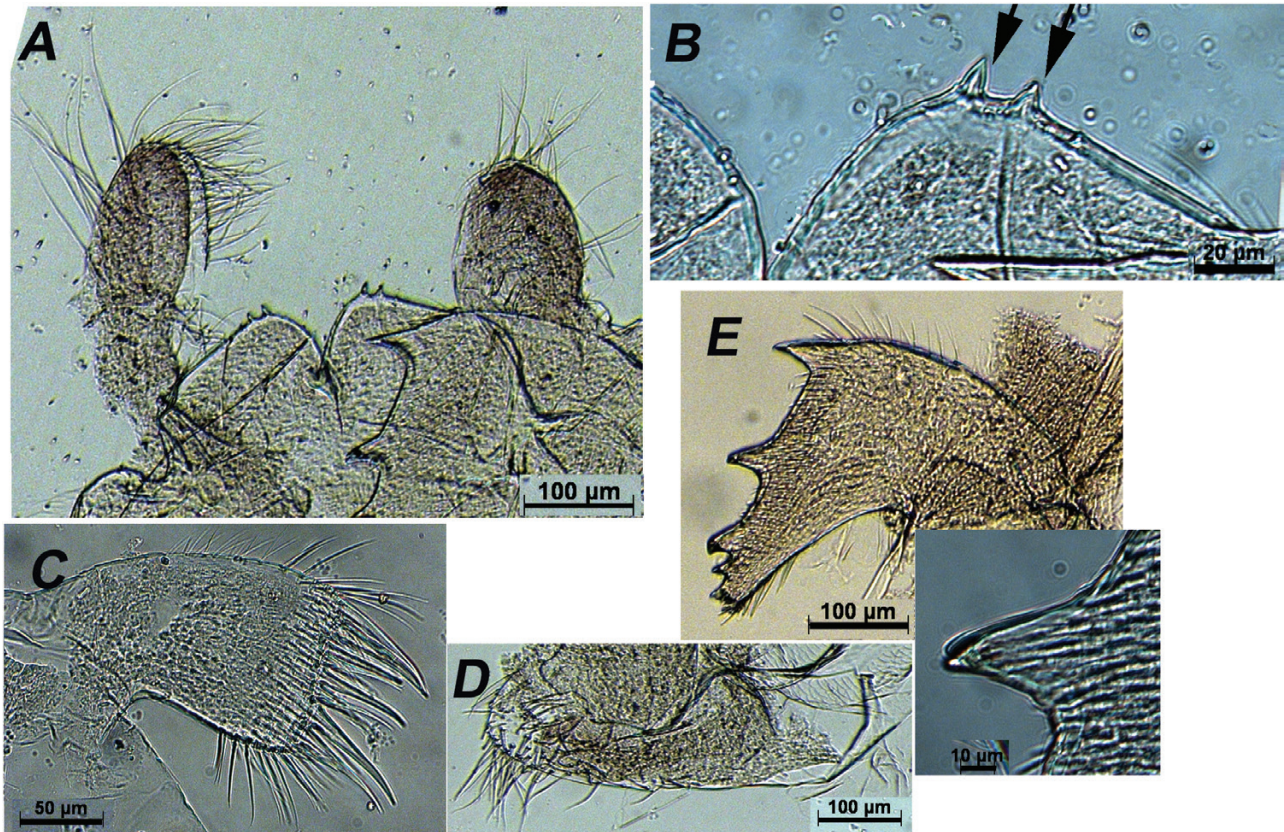

**Figure 6.** *Cantellius* cf. *sumbawae*, trophi. A, labrum and two maxillae. B, enlargement of labrum, with arrows indicating teeth on labrum. C, maxillule. D, mandibular palp. E, mandible; inset, median tooth of mandible.

MNHN-IK-2015-660, 11°34.6'S, 45°05.2'E, 12 April 1977. TAU AR29859, host *Stylaster tenisonwoodsii* PC190371, Bangka Island, 5 m, Indonesia, Università Politecnica delle Marche-DiSVA, Ancona, Italy, 16 December 2011. TAU AR29860, host *Stylaster* cf. *eximius*, BALA1, Siladen Islands Indonesia, 15 m, Università Politecnica delle Marche-DiSVA, Ancona, Italy, 13 December 2011.

**Description:** Shell conical, four plated, externally covered by the hydroid skeleton and tissue. Sheath forming inner lamina, basis, shallow cup shape with radiating ridges and furrows reaching the centre of the basis. Orifice central, small. Scutum and tergum separated, white. Scutum triangular, basal margins curved; pit at basitergal angle; ocludent margin length approximately equal to tergal margin. Ocludent margin and tergal margin straight. Externally, growth ridges parallel to basal margin outline, forming teeth on ocludent margin. Cavity for lateral depressor wide, shallow. Inner side with adductor ridge that varies in different specimens; articular ridge on tergal margin curved and occupying nearly entire length of margin. Tergum elongated; carinal margin about two-thirds of scutal margin with blunt rounded spur;

scutal margins slightly curved, with small beak at the apex; basal margins sinusoidal; external surface with growth ridges parallel to basal margins; shallow median furrow from apex to spur base.

**Remarks:** The identification of MNHN-IU-5863 is based only on the morphology of scuta, because the terga are broken and cannot be used as a morphological character. In the specimens from the two species of *Stylaster*, there is a prominent pit at the basitergal angle and a cavity for the lateral depressor, as in *C. pallidus*. The apices of the terga are broken, and the wide spur might fit also to *Cantellius arcuatus* (Hiro, 1938). However, it is more likely that it belongs to *C. pallidus*. *Cantellius pallidus* is the most abundant species of *Cantellius* and has been recorded from 37 species of corals, whereas *C. arcuatus* has been recorded from only two species of corals (Ogawa & Matsuzaki, 1992).

***CANTELLIUS CORNUTERGUM* ACHITUV SP. NOV.**

(FIG. 10)

urn:lsid:zoobank.org:pub:96954D17-136F-4D68-9D59-64C5EAFB6053

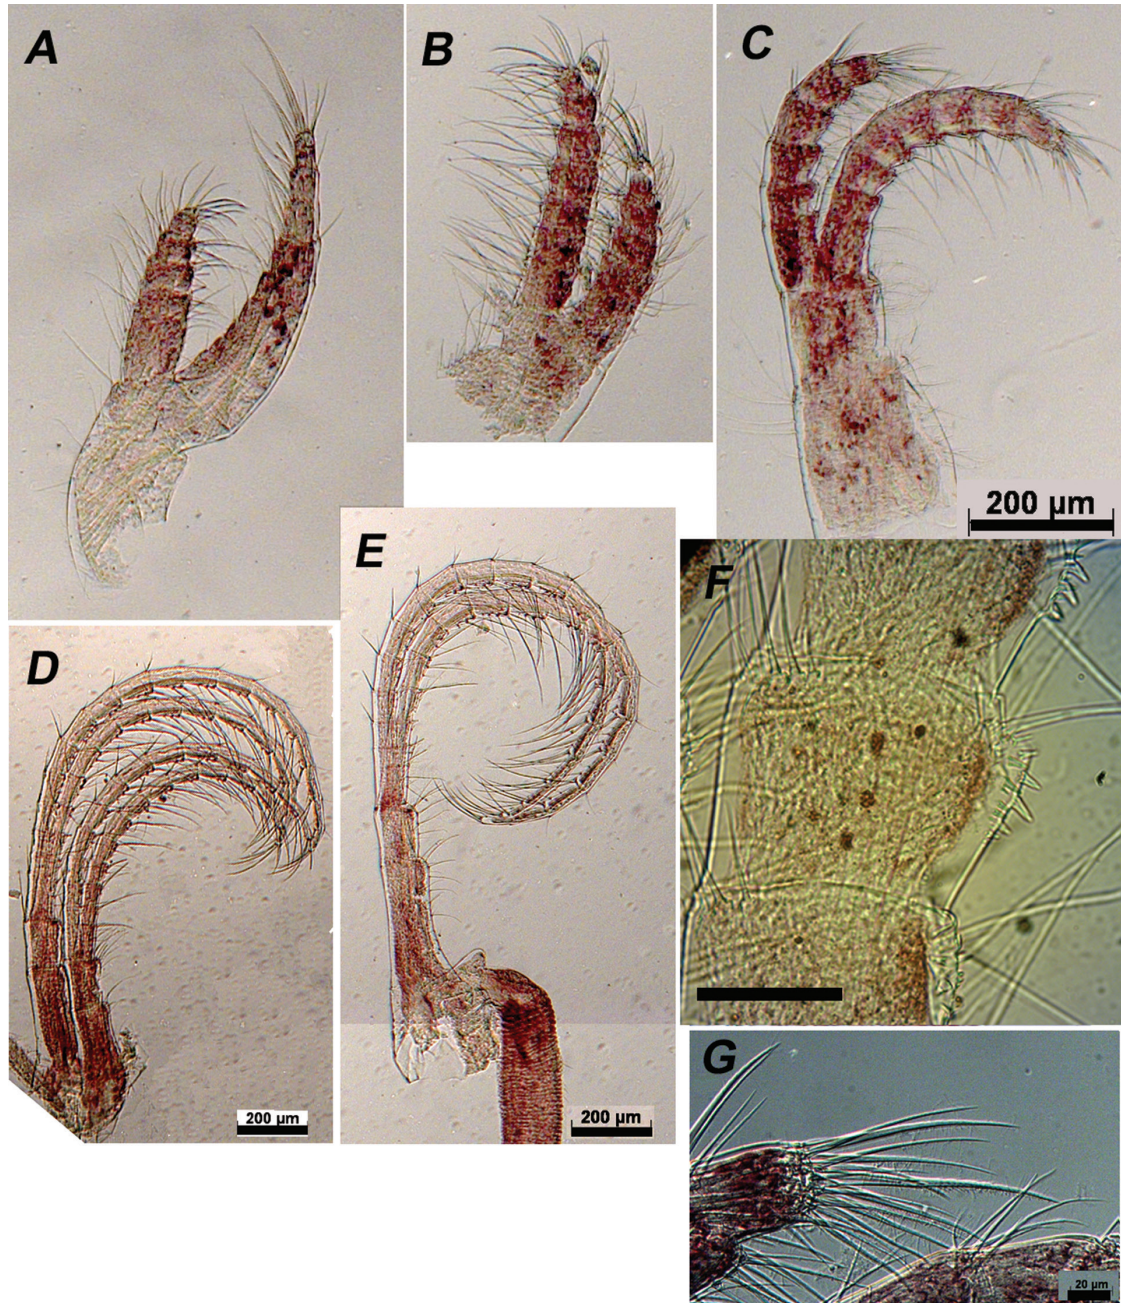

**Figure 7.** *Cantellius cf. sumbawae*. A–C, cirri I–III, respectively. D, cirri IV and V. E, cirrus VI with basidorsal point and proximal part of penis. F, Cirrus III spines on front of articles. G, Cirrus II, terminal setae.

**Holotype:** MNHN-IU-5872, host *Distichopora violacea* MNHN-IK-2015-660, 11°34.6'S, 45°05.2'E, 12 April 1977.

**Paratype:** MNHN-IU-5869, host *Distichopora violacea* MNHN-IK-2015-660, same data as holotype.

**Diagnosis:** Pyromatid with four shell plates. Scutum triangular, with occludent margin longer than basal

margin. Small crests for the depressor muscle in the scutum. External median furrow along tergum with external median furrow. Carinal margin of tergum strongly curved.

**Description:** Shell conical, four plated (rostrum, carina and paired latera), externally covered by the hydroid skeleton and tissue (Fig. 10A). Orifice central, rhomboid. Scutum and tergum separated,

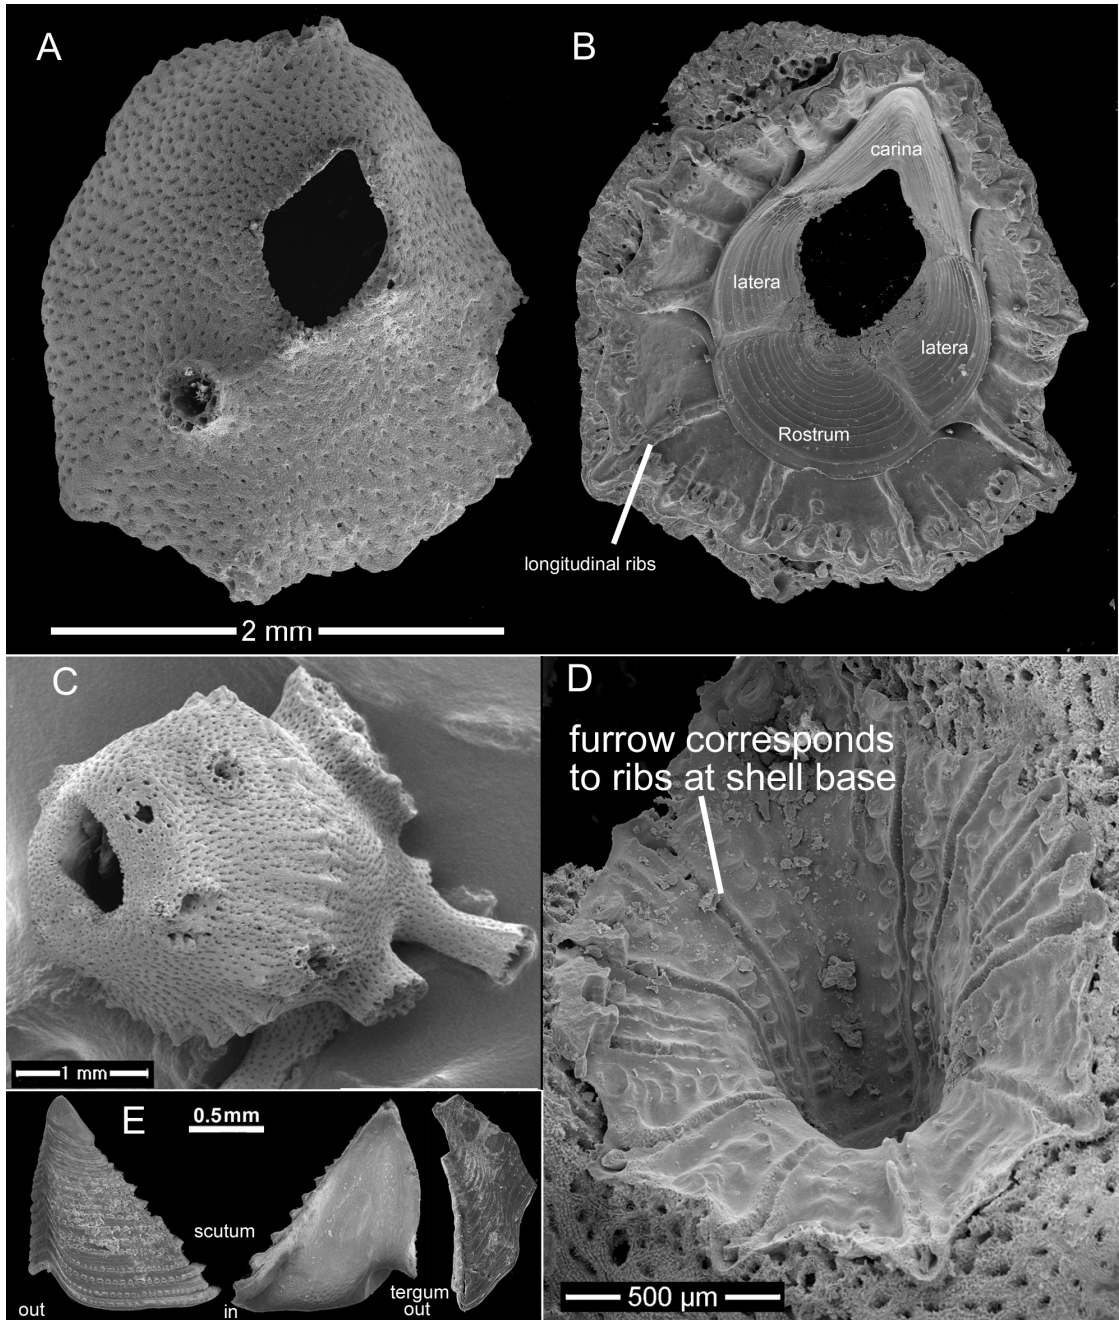

**Figure 8.** *Cantellius* cf. *pallidus* from *Stylaster tenisonwoodsii*. A, shell outer view. B, shell inner view. C, specimen on host. D, basis. E, opercular valves.

white. Scutum triangular; basal margin straight, curving at the basitergal angle; four to five parallel small pits for the scutal depressor muscle at basioccludent angle; four parallel small pits for the lateral depressor muscle at basitergal angle (Fig. 10B). Occludent margin length approximately equal to tergal margin length. Occludent margin and tergal margin straight. Deep, round pit for

adductor muscle. Adductor ridge prominent; articular ridge occupies about four-fifths of tergal margins. Externally, growth ridges parallel to basal margin outline, forming teeth on occludent margin. Tergum elongated; carinal margin about half of scutal margin, with blunt rounded spur; scutal margins strongly curved, forming prominent beak at the apex; basal margins slightly concave;

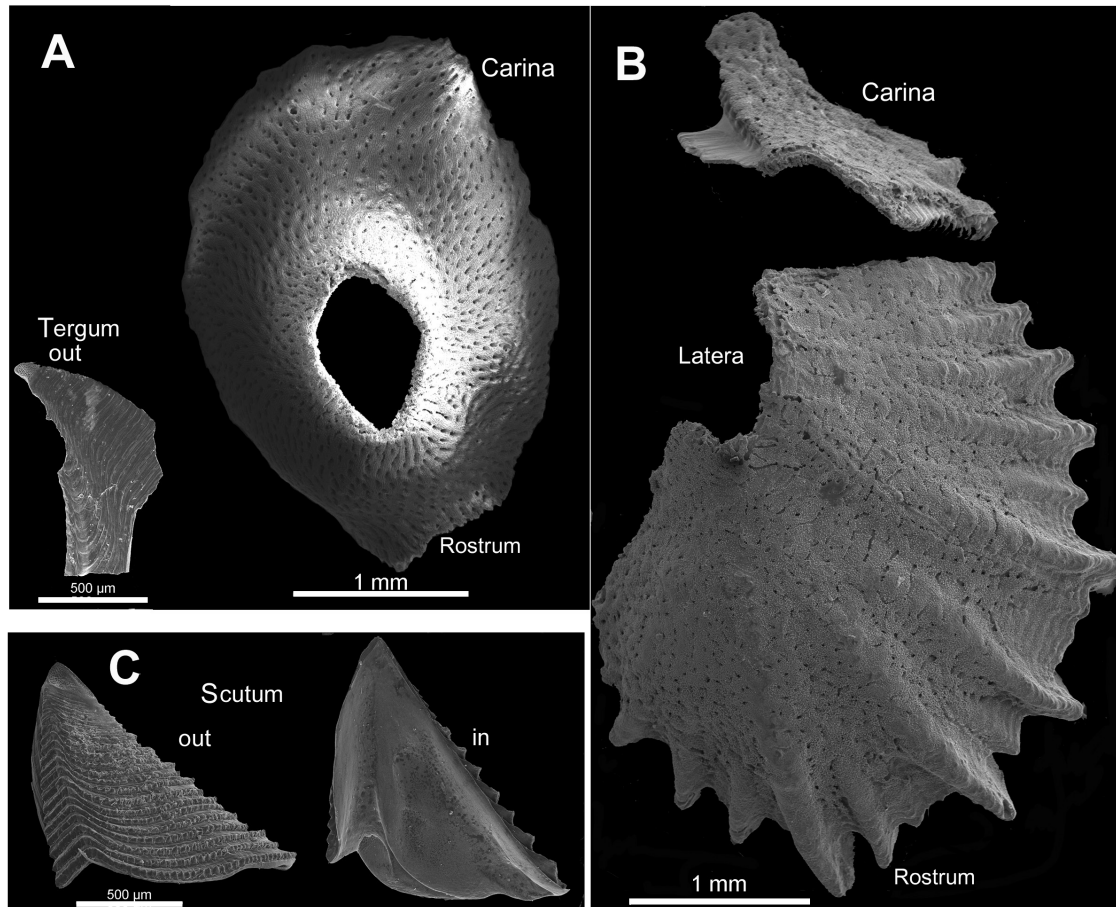

**Figure 9.** *Cantellius cf. pallidus* from *Stylaster cf. eximius*. A, shell and tergum (broken). B, shell: rostrum, laterum and carina. Scutum outer and inner side.

external surface with growth ridges parallel to basal margins; shallow median furrow from apex to spur base. Internally, shallow crests for depressor muscle.

*Etymology:* From Latin *cornu*, horn, indicating the presence of prominent beak at the apex of the *tergum*, meaning ‘back’ or ‘rear’.

*Remarks:* The opercular valves of this species are different from all known species of *Cantellius*. The noticeable features are the small crests for the two depressor muscles. The shape of the scutum is most similar to that of *Cantellius tredecimus* (Kolosvary, 1947), which has neither adductor ridges nor adductor pits. The tergum may resemble that of *C. arcuatus*; the lower part toward the basis is straight, whereas in *C. arcuatus* the upper part next to the carinal margin is strongly curved. In the original description of *C. arcuatus*, Hiro (1938) does not mention the presence of an external median

furrow and internal crests for the depressor muscle of the tergum. On the basis of these differences, we think this is a new species.

## DISCUSSION

Based on the criteria presented above, the barnacles from the hydrozoans *Stylaster* and *Distichopora* should be classified as *Cantellius* owing to the presence of four-plate shells and balanoid-type opercular plates. The determination of species of this genus is mainly, and in some cases exclusively, based on the morphology of the opercular valves (Ross & Newman, 1973). Using this character, the barnacles described in the present study fit different species of *Cantellius*, including a new species.

Many samples of *Cantellius* could not be identified with full confidence to the species level. Malay & Michonneau (2014) did not use nominal species for

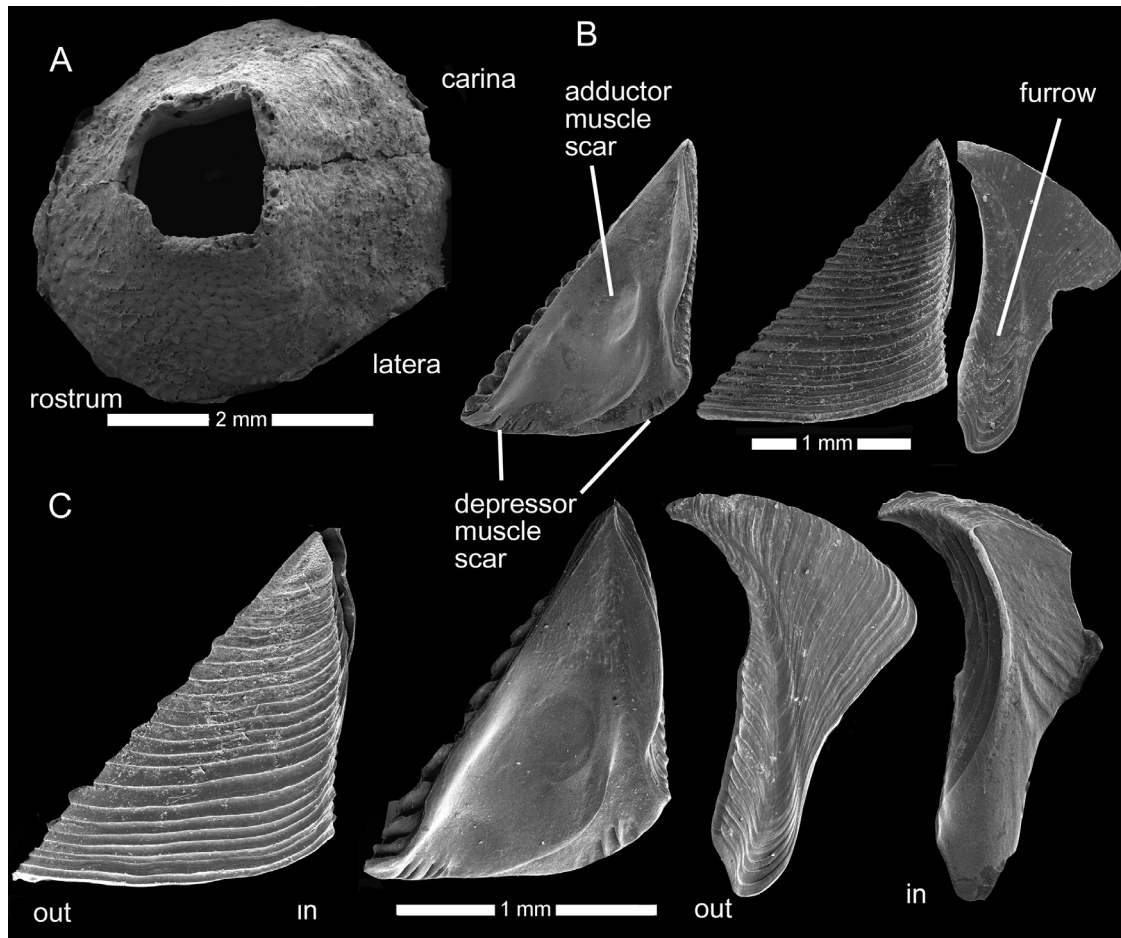

**Figure 10.** *Cantellius cornutergum* from *Distichopora violacea*. A, shell. B, scutum inner and outer view, and terga outer view. C, scutum inner and outer view, and terga outer and inner view.

most of their samples, but showed that barnacles of the same genus originating from different hosts belong to different ESUs. These authors argued that the species-level taxonomy of coral-dwelling barnacles is problematic and that some genera included many yet undescribed species. Using molecular markers, they noted that even a monotypic genus, such as *Neotrevathana*, is found to be a complex of three different ESUs, all fitting the morphological description for *Neotrevathana*. Brickner *et al.* (2010) showed that what was regarded as a single species of *Trevathana* encompasses four species. Tsang *et al.* (2009) revealed that the barnacle *Wanella milleporae*, which inhabits the fire coral, is a complex of cryptic species inhabiting different species of *Millepora*. Also, our results reflect the existence of cryptic species within the *Cantellius* complex. Our material contains sequences of morphologically defined species of *Cantellius*, e.g. H3 of *C. pallidus*, extracted from different coral hosts and found on different clades

of the phylogenetic tree. Therefore, it is tempting to speculate that, although morphologically *Cantellius* from *Heteropsammia* and the population from *Distichopora* are assigned to *C. cf. sumbawae*, they are, in fact, two different ESUs. However, without appropriate material, this assumption cannot be validated.

The genus *Cantellius* is the most species-rich genus of Pyrgomatidae, with 22 nominal reported species (Ross & Newman, 2000), and more have been added during the last two decades (Achituv, 2001; Achituv & Hoeksema, 2003; Achituv *et al.*, 2009; present study). This genus occupies the largest number of scleractinians (Ogawa & Matsuzaki, 1992), with no record from other taxonomic units. Ross & Newman (1973) stated that highly modified forms are highly host specific, all the more so for monotypic genera. However, within the genus *Cantellius*, some species were recorded from a single host, whereas others were from several hosts, with *C. pallidus* being

recorded from nearly 40 coral species (Ogawa & Matsuzaki, 1992).

In the phylogenetic trees based on molecular markers, *Armatobalanus allium* and *Cantellius* are located at the base of Pyrgomatidae (Simon-Blecher *et al.*, 2007; Malay & Michonneau, 2014; Tsang *et al.*, 2014). Morphologically, *Cantellius* shows the most plesiomorphic characteristics within the Indo-Pacific coral-inhabiting barnacles, with four shell-wall plates and unmodified balanoid-type opercular valves. It was Darwin (1854) who first pointed out that *Armatobalanus allium* 'shows the affinity and passage to the coral-inhabiting genus *Creusia*', with the reduction of the carino lateral plate that is absent in the Pyrgomatidae. Ross & Newman (1973) suggested that Pyrgomatinae and perhaps Megatrematinae evolved independently from an *Armatobalanus* ancestor. It appears that *Cantellius* inhabiting the hydrozoan *Distichopora* also evolved from an *Armatobalanus* or a common ancestor of the genus *Cantellius*. Speciation in Pyrgomatidae led to the inhabitation of a large variety of scleractinians. Moreover, this speciation is not limited to scleractinians, but also encompasses hydrozoans.

We show here that the barnacles extracted from the hydrozoan *Distichopora* cluster with the pyrgomatid *Cantellius* that usually inhabits a different class of Cnidaria, the Scleractinia. The inclusion of the barnacles extracted from the hydrozoan within the Pyrgomatidae refutes our previous hypothesis that the symbiosis of pyrgomatids involved only Scleractinia. These barnacles are found in the same clade as *Cantellius* and *Armatobalanus allium*. It is of special interest to study the relationship of these barnacles with *Armatobalanus nefrens* inhabiting the stylasterids *Errinopora pourtalesi* and *Stylaster californicus* from northern California.

#### ACKNOWLEDGEMENTS

The study was supported by Israel Science Foundation grant 308/14. Material used in this study was collected during Y.A.'s visit to the Museum National d'Histoire Naturelle, Paris (MNHN), supported by the SYNTHESYS Project (<http://www.synthesys.info>), financed by the European Community Research Infrastructure Action under the Integrating Activities Programmes (FR-TAF-3382). The specimens collected in Indonesia were imported under CITES permit code 04291/IV/SATS-LN/2011. The help of Dr Laure Corbari and Ms Paula A. Rodriguez-Moreno of MNHN Paris is greatly appreciated. Dr Yaakov Langzam of the Mina and Everard Goodman Faculty of Life Sciences, Bar Ilan University, helped with the

scanning electron microscopy work. Finally, we thank Ms Yael Laure for helping in editing and improving this paper. We thank the anonymous reviewers for their comments and the editor for comments that helped improve this paper.

#### CONFLICT OF INTEREST

The authors declare no conflict of interest.

#### REFERENCES

- Achituv Y. 2001.** *Cantellius alphonsei* n. sp., a new coral-inhabiting barnacle (Cirripedia, Pyrgomatinae) of *Montipora*. *Crustaceana* **74**: 217–226.
- Achituv Y, Hoeksema BW. 2003.** *Cantellius cardenae* spec. nov. (Cirripedia: Pyrgomatinae) from *Acropora (Isopora) brueggemanni* (Brook, 1893) (Anthozoa: Acroporidae), a case of host specificity in a generalist genus. *Zoologische Mededelingen, Leiden* **77**: 1–8.
- Achituv Y, Simon-Blecher N. 2006.** *Pyrgopsella* (Cirripedia: Balanomorphia: Pyrgomatidae) is not a sponge-inhabiting barnacle. *Zootaxa* **1319**: 29–42.
- Achituv Y, Simon-Blecher N. 2014.** The rise and the fall of *Pyrdopsella youngi* – rediscovery of a lost species. *Journal of Crustacean Biology* **34**: 663–670.
- Achituv Y, Tsang, LM, Chan, BKK. 2009.** A new species of *Cantellius* and a redescription of *C. sextus* (Hiro, 1938) (Cirripedia, Balanomorphia, Pyrgomatidae) from the elephant skin coral, *Pachyseris speciosa* (Dana, 1846) (Scleractinia, Agariciidae) from Taiwan. *Zootaxa* **2022**: 15–28.
- Borradaile LA. 1903.** Marine Crustaceans. Part 7. The barnacles (Cirripedia). In: Gardiner JS, ed. *The fauna and geography of the Maldive and Laccadive Archipelagos*. Cambridge: Cambridge University Press, 440–443.
- Brickner I, Simon-Blecher N, Achituv Y. 2010.** Darwin's *Pyrgoma* (Cirripedia) revisited: revision of the *Savignium* group, molecular analysis and description of new species. *Journal of Crustacean Biology* **30**: 266–291.
- Broch H. 1931.** Papers from Dr. Th. Mortensen's Pacific expedition 1914–1916. LVI. Indomalayan Cirripedia. *Videnskabelige Meddelelser fra Dansk Naturhistorisk Forening i København* **91**: 1–146.
- Broch H. 1935.** Einige Stylasteriden (Hydrokorallen) der Ochotskischen und Japanischen See. *Explorations des Mers d'URSS* **22**: 58–60.
- Broch H. 1947.** Stylasteridae (Hydrocorals) of the John Murray Expedition to the Indian Ocean. *Scientific Reports of the John Murray Expedition* **26**: 33–46.
- Colgan DJ, McLauchlan A, Wilson GDF, Livingston SP, Edgecombe GD, Macaranas G, Cassis G, Gray MR. 1998.** Histone H3 and U2 snRNA DNA sequences and arthropod molecular evolution. *Australian Journal of Zoology* **46**: 419–437.



- Darwin C. 1854.** *A monograph on the sub-class Cirripedia with figures of all the species. The Balanidae the Verrucidae etc.* London: Ray Society.
- Feine I, Shpitzen M, Roth J, Gafny R. 2016.** A novel cell culture model as a tool for forensic biology experiments and validations. *Forensic Science International: Genetics* **24**: 114–119.
- Folmer O, Black M, Hoeh W, Lutz RA, Vrijenhoek RC. 1994.** DNA primers for amplification of mitochondrial cytochrome *c* oxidase subunit I from diverse metazoan invertebrates. *Molecular Marine Biology and Biotechnology* **3**: 294–299.
- Hickson SJ, England HM. 1905.** The Stylasterina of the Siboga Expedition. *Siboga Expedition* **8**: 1–26.
- Hiro F. 1935.** A study of cirripeds associated with corals occurring in Tanbe Bay. *Records of Oceanographic Works in Japan* **7**: 45–72.
- Hiro F. 1938.** Studies on the animals inhabiting reef coral II. Cirripeds of the genera *Creusia* and *Pyrgoma*. *Palao Tropical Biological Station Studies* **3**: 391–416.
- Hoek PPC. 1913.** The Cirripedia of the Siboga Expedition. B. Cirripedia sessilia. *Siboga-Expeditie Monographie XXXIb*: 129–275.
- Kocher TD, Thomas WK, Meyer A, Edwards SV, Pääbo S, Villablanca FX, Wilson AC. 1989.** Dynamics of mitochondrial DNA evolution in animals: amplification and sequencing with conserved primers. *Proceedings of the National Academy of Sciences of the United States of America* **86**: 6196–6200.
- Kolosváry G. 1947.** A study of the cirripedes associated with corals in the collection of the Hungarian National Museum. *Proceedings of the Zoological Society of London* **117**: 425–428.
- Kolosvary G. 1948.** New data of cirripedes associated with corals. *Annals and Magazine of Natural History, ser. 11* **14**: 358–368.
- Kumar S, Stecher G, Tamura K. 2016.** MEGA7: molecular evolutionary genetics analysis version 7.0 for bigger datasets. *Molecular Biology and Evolution* **33**: 1870–1874.
- Malay MCD, Michonneau F. 2014.** Phylogenetic and morphological evolution of coral-dwelling barnacles (Balanomorpha: Pyrgomatidae). *Biological Journal of the Linnean Society* **113**: 162–179.
- Mokady O, Loya Y, Achituv Y, Gefen E, Grauer D, Rozenblatt S, Brickner I. 1999.** Speciation versus phenotypic plasticity – Darwin's observations in an ecological context. *Journal of Molecular Ecology* **49**: 367–375.
- Newman WA. 2007.** Cirripedia. In: Carlton JT, ed. *The Light and Smith manual: intertidal invertebrates from central California to Oregon*. Berkeley: University of California Press, 475–484.
- Nilsson-Cantell CA. 1938.** Cirripeds from the Indian Ocean in the collection of the Indian Museum, Calcutta. *Memoirs of the Indian Museum* **13**: 1–81.
- Ogawa K, Matsuzaki K. 1992.** An essay on host specificity, systematic taxonomy, and evolution of the coral-barnacles. *Bulletin of the Biogeographical Society of Japan* **47**: 87–101.
- Pérez-Losada M, Høeg JT, Simon-Blecher N, Achituv Y, Jones D, Crandall KA. 2014.** Molecular phylogeny, systematics and morphological evolution of the acorn barnacles (Thoracica: Sessilia: Balanomorpha). *Molecular Phylogenetics and Evolution* **81**: 147–158.
- Pica D, Bertolino M, Calcinai B, Puce S, Bavestrello G. 2012.** Boring and cryptic sponges in stylasterids (Cnidaria: Hydrozoa). *Italian Journal of Zoology* **79**: 266–272.
- Pica D, Cairns SD, Puce S, Newman WA. 2015.** Southern Hemisphere deep-water stylasterid corals including a new species, *Errina labrosa* sp. n. (Cnidaria, Hydrozoa, Stylasteridae), with notes on some symbiotic scalpellids (Cirripedia, Thoracica, Scalpellidae). *ZooKeys* **472**: 1–25.
- Pica D, Tribollet A, Golubic S, Bo M, Di Camillo CG, Bavestrello G, Puce S. 2016.** Microboring organisms in living stylasterid corals (Cnidaria, Hydrozoa). *Marine Biology Research* **12**: 573–582.
- Roberts J, Wheeler A, Freiwald A. 2006.** Reefs of the deep: the biology and geology of cold-water coral ecosystems. *Science* **312**: 543–547.
- Rosell NC. 1975.** On two noteworthy balanids (Cirripedia: Thoracica) from the Sulu Archipelago, Philippines. *Crustaceana* **29**: 206–214.
- Ross A, Newman WA. 1973.** Revision of the coral-inhabiting barnacles (Cirripedia: Balanidae). *Transactions of the San Diego Society of Natural History* **17**: 137–173.
- Ross A, Newman WA. 2000.** Coral barnacles: Cenozoic decline and extinction in the Atlantic/east Pacific versus diversification in the Indo-west Pacific. In: Moosa MK, Soemodihardjo S, Soegiarto A, Romimohtarto K, Nontji A, Soekarno & Suharsono, eds. *Proceedings of the Ninth International Coral Reef Symposium, Bali 23–27 Oct. 2000*, 179–184.
- Simon-Blecher N, Huchon D, Achituv Y. 2007.** Phylogeny of coral-inhabiting barnacles (Cirripedia; Thoracica; Pyrgomatidae) based on 12S, 16S and 18S rDNA analysis. *Molecular Phylogenetics and Evolution* **44**: 1333–1341.
- Thompson JD, Higgins DG, Gibson TJ. 1994.** CLUSTAL W: improving the sensitivity of progressive multiple sequence alignment through sequence weighting, position-specific gap penalties and weight. *Nucleic Acids Research* **22**: 4673–4680.
- Tribollet A, Pica D, Puce S, Campbell SE, Radtke G, Golubic S. 2018.** Euendolithic conchocelis stage (Bangiales, Rhodophytes) in the skeletons of live stylasterid reef corals. *Marine Biodiversity* **48**: 1855–1862.
- Tsang LM, Achituv Y, Chu KH, Chan BKK. 2012.** Zoogeography of intertidal communities in the West Indian Ocean as determined by ocean circulation systems: patterns from the *Tetraclita* barnacles. *PLoS One* **7**: e45120.
- Tsang LM, Chan BK, Shih FL, Chu KH, Chen CA. 2009.** Host-associated speciation in the coral barnacle *Wanella milleporae* (Cirripedia: Pyrgomatidae) inhabiting the *Millepora* coral. *Molecular Ecology* **18**: 1463–1475.
- Tsang LM, Chu KH, Nozawa Y, Chan BKK. 2014.** Morphological and host specificity evolution in coral symbiont barnacles (Cirripedia: Pyrgomatidae) inferred

from multilocus phylogeny. *Molecular Phylogenetics and Evolution* **77**: 11–22.

**Walsh PS, Metzger DA, Higuchi R. 1991.** Chelex® 100 as a medium for simple extraction of DNA for PCR-based typing from forensic material. *Biotechniques* **10**: 506–518.

**Zibrowius H. 1981.** Associations of Hydrocorallia Stylasterina with gall-inhabiting Copepoda Siphonostomatoidea from the south-west Pacific. Part I. On the stylasterine hosts, including two new species, *Stylaster papuensis* and *Cryphelia cryptotrema*. *Bijdragen tot de Dierkunde, Amsterdam* **51**: 268–286.

### SUPPORTING INFORMATION

Additional Supporting Information may be found in the online version of this article at the publisher's web-site:

**Appendix S1.** Information about the specimens used for the phylogenetic and morphological studies.

**Table S1.** GenBank accession numbers used in for maximum likelihood phylogenetic trees and for estimation of pairwise distances between specimens of different species of *Cantellius* and other pyrgomatids.
